# Supplementary material for: Current Status of Biodiversity Assessment and Conservation of Wild Olive (Olea europaea L. subsp. europaea var. sylvestris)
Source: MDPI journal article supplement (doi:10.3390/plants11040480), 2022-02-10
Supplement: s1 [file s1]

Review

# Current status of biodiversity assessment and conservation of wild olive (*Olea europaea* L. subsp. *europaea* var. *sylvestris*)

Valentina Fanelli <sup>1,\*</sup>, Isabella Mascio <sup>1</sup>, Wahiba Falek <sup>2</sup>, Monica Marilena Miazzi <sup>1,\*</sup> and Cinzia Montemurro <sup>1,3,4</sup>

<sup>1</sup> Department of Soil, Plant and Food Sciences, University of Bari Aldo Moro, via Amendola 165/A, Bari, 70125, Italy; mascioisa@gmail.com (I.M.); cinzia.montemurro@uniba.it (C.M.)

<sup>2</sup> Ecole Nationale Supérieure de Biotechnologie, Ville universitaire Ali Mendjeli, BP E66 – 251000 – Constantine, Algeria; wfalek@ymail.com (W.F.)

<sup>3</sup> Spin off Sinagri s.r.l., University of Bari Aldo Moro, via Amendola 165/A, Bari, 70125, Italy

<sup>4</sup> Institute for Sustainable Plant Protection–Support Unit Bari, National Research Council of Italy (CNR), Via Amendola 165/A, Bari, 70125, Italy

\* Correspondence: valentina.fanelli@uniba.it (V.F.); monicamarilena.miazzi@uniba.it (M.M.M.)

## Supplementary Material

**Table S1.** Population size and country of origin of samples analyzed in the studies included in the meta-analysis.

| Reference               | Country of origin | Population size |
|-------------------------|-------------------|-----------------|
| Belaj et al., 2007      | Spain             | 107             |
|                         | Italy             | 64              |
| Belaj et al., 2010      | Spain             | 107             |
| Erre et al., 2010       | Italy             | 21              |
| Belaj et al., 2011      | Spain             | 48              |
| Diez et al., 2015       | Israel            | 38              |
|                         | Spain             | 48              |
|                         | Italy             | 10              |
| Beghè et al., 2017      | Spain             | 225             |
| Boucheffa et al., 2017  | Algeria           | 16              |
| Chiappetta et al., 2017 | Italy             | 99              |
| Boucheffa et al., 2019  | Algeria           | 12              |
| Gros-Balthazard, 2019   | Turkey            | 19              |
| Mariotti et al., 2020   | Spain             | 73              |
| Dervishi et al., 2021   | Albania           | 19              |
| Falek et al., 2022      | Algeria           | 174             |
